# Supplementary material
Source: Elsevier journal article supplement (https://comptes-rendus.academie-sciences.fr/chimie/article/10.1016/j.crci.2016.11.001/file/attach/mmc1.pdf)
Supplement: mmc1 [file mmc1.pdf]

# Stability and dynamics of silicate/organic hybrid micelles

*Andrew Kacheff and Eric Prouzet*

**Electronic Supplementary Information**

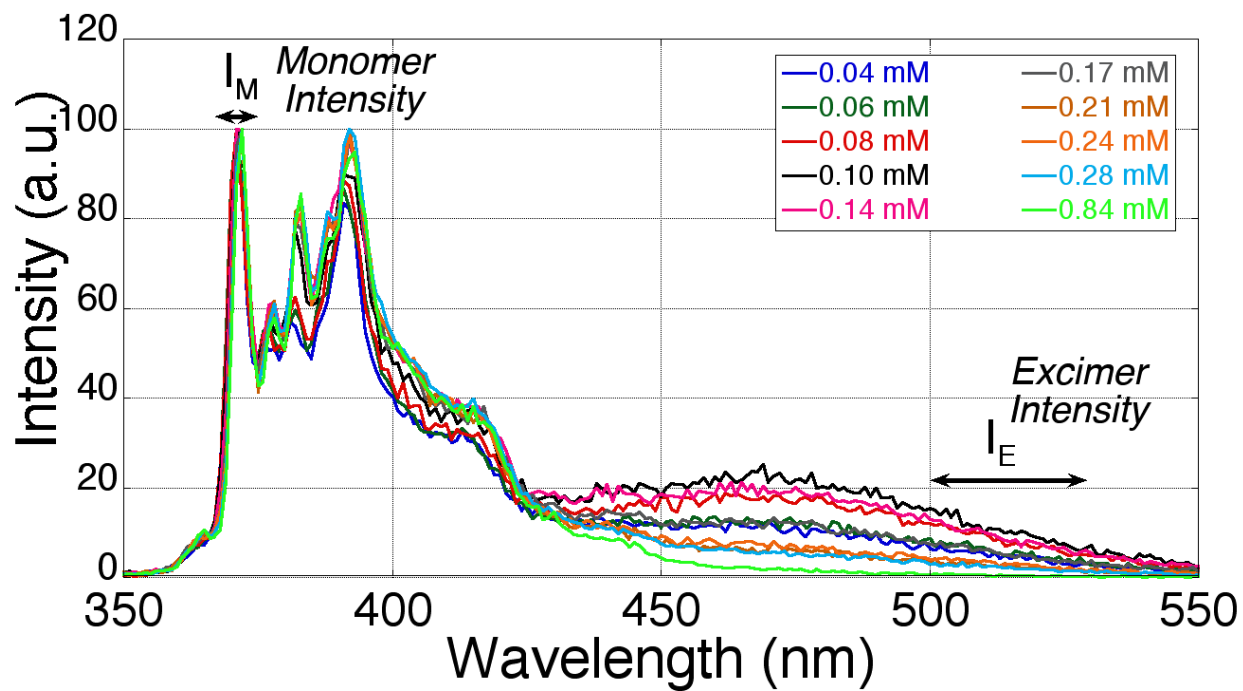

Figure S1: Normalized steady state fluorescence spectra for T15-S-12/FSS/0/c series

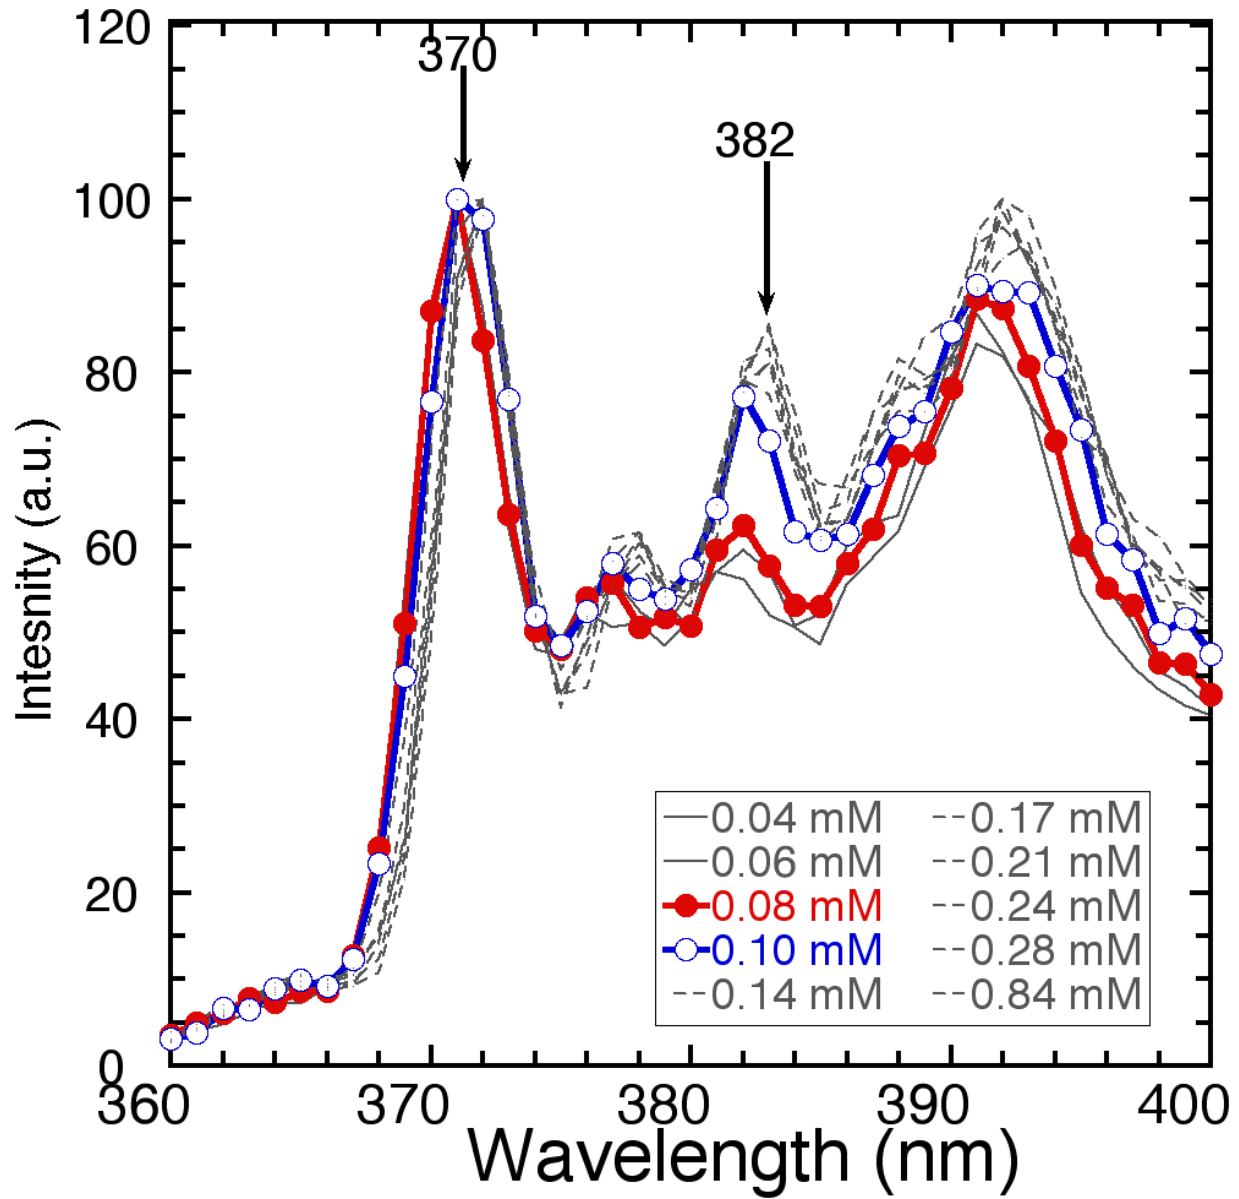

Figure S2: Zoom in of normalized steady state fluorescence spectra for T15-S-12/FSS/0/c series showing the I1 (370 nm) and I3 (382 nm (peaks))

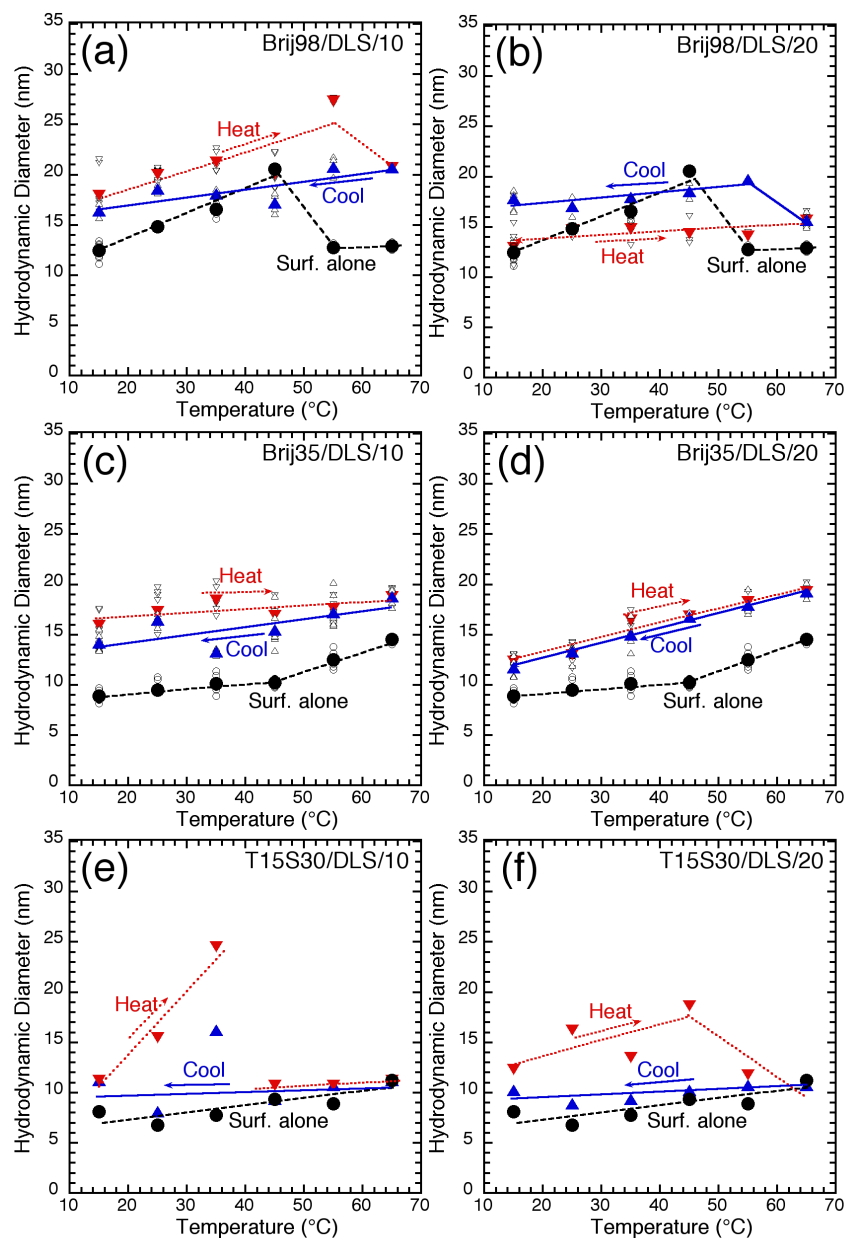

Figure S3: Temperature evolution of the hydrodynamic diameter for different alkyl-PEO surfactants (pure micelles: dots; hybrid micelles upon heating: down triangles; hybrid micelles upon cooling: up triangles) and different TEOS/surf. Molar ratios (10 & 20): (a) Brij98/DLS/10, (b) Brij98/DLS/20, (c) Brij35/DLS/10, (d) Brij35/DLS/20, (e) Tergitol15S30/DLS/10, and (f) Tergitol15S30/DLS/20. Filled marks correspond to the average value resulting from 20 individual recordings; unfilled marks correspond to values for each individual recording. (lines are for visual help).

Table S1: Parameters  $\langle n \rangle$ ,  $k_q$ , and  $\tau_M$  retrieved from the monomer fluorescence decays analysis with Equation 2.

[Surfactant] = 0.52 mM

| <i>Surfactant Only</i> |                     |                                    |                  | <i>TEOS:Surfactant 5</i> |                     |                                    |                  |
|------------------------|---------------------|------------------------------------|------------------|--------------------------|---------------------|------------------------------------|------------------|
| [Py] ( $\mu\text{M}$ ) | $\langle n \rangle$ | $k_q$<br>( $10^7 \text{ s}^{-1}$ ) | $\tau_M$<br>(ns) | [Py] ( $\mu\text{M}$ )   | $\langle n \rangle$ | $k_q$<br>( $10^7 \text{ s}^{-1}$ ) | $\tau_M$<br>(ns) |
| <b>1.9</b>             | 0.38                | 1.02                               | 187              | <b>0.8</b>               | 0.14                | 0.0095                             | 193              |
| <b>2.1</b>             | 0.42                | 1.10                               | 186              | <b>0.8</b>               | 0.23                | 0.0086                             | 231              |
| <b>4.5</b>             | 0.80                | 1.08                               | 192              | <b>3.2</b>               | 0.56                | 0.0096                             | 190              |
| <b>7.3</b>             | 1.19                | 1.11                               | 186              | <b>4.3</b>               | 0.85                | 0.0084                             | 195              |
| <b>9.6</b>             | 1.60                | 1.14                               | 178              | <b>5.4</b>               | 0.94                | 0.0090                             | 206              |
|                        |                     |                                    |                  | <b>8.1</b>               | 1.40                | 0.0092                             | 213              |
|                        |                     |                                    |                  | <b>9.6</b>               | 1.69                | 0.0097                             | 205              |

| <i>TEOS:Surfactant 10</i> |                     |                                    |                  | <i>TEOS:Surfactant 15</i> |                     |                                    |                  |
|---------------------------|---------------------|------------------------------------|------------------|---------------------------|---------------------|------------------------------------|------------------|
| [Py] ( $\mu\text{M}$ )    | $\langle n \rangle$ | $k_q$<br>( $10^7 \text{ s}^{-1}$ ) | $\tau_M$<br>(ns) | [Py] ( $\mu\text{M}$ )    | $\langle n \rangle$ | $k_q$<br>( $10^7 \text{ s}^{-1}$ ) | $\tau_M$<br>(ns) |
| <b>1.4</b>                | 0.32                | 0.97                               | 199              | <b>0.3</b>                | 0.19                | 0.58                               | 231              |
| <b>1.8</b>                | 0.36                | 0.96                               | 192              | <b>0.7</b>                | 0.24                | 0.72                               | 215              |
| <b>3.2</b>                | 0.65                | 0.98                               | 212              | <b>3.3</b>                | 0.58                | 0.89                               | 212              |
| <b>4.1</b>                | 0.76                | 1.02                               | 212              | <b>4.6</b>                | 0.89                | 0.82                               | 197              |
| <b>6.2</b>                | 1.17                | 1.06                               | 194              | <b>5.2</b>                | 1.06                | 0.86                               | 208              |
|                           |                     |                                    |                  | <b>8.0</b>                | 1.49                | 0.93                               | 227              |
|                           |                     |                                    |                  | <b>9.9</b>                | 1.74                | 0.94                               | 211              |
